# Supplementary material for: Variations in Microstructural and Physicochemical Properties of Candelilla Wax/Rice Bran Oil–Derived Oleogels Using Sunflower Lecithin and Soya Lecithin
Source: MDPI journal article supplement (doi:10.3390/gels7040226), 2021-11-22
Supplement: s1 [file s1]

# Variations in Microstructural and Physicochemical Properties of Candelilla Wax/Rice Bran Oil-Derived Oleogels Using Sunflower Lecithin and Soya Lecithin

Deblu Sahu <sup>1</sup>, Deepti Bharti <sup>1</sup>, Doman Kim <sup>2</sup>, Preetam Sarkar <sup>3</sup> and Kunal Pal <sup>1,\*</sup>

<sup>1</sup>Department of Biotechnology and Medical Engineering, National Institute of Technology, Rourkela 769008, Odisha, India

<sup>2</sup>Department of International Agricultural Technology & Institute of Green BioScience and Technology, Seoul National University, Seoul 151747, Gwangwon-do, Korea

<sup>3</sup>Department of Food Process Engineering, National Institute of Technology, Rourkela 769008, Odisha, India

\* Correspondence: kpal.nitrkl@gmail.com

## Supplementary materials

### 1. Polarized light microscopy

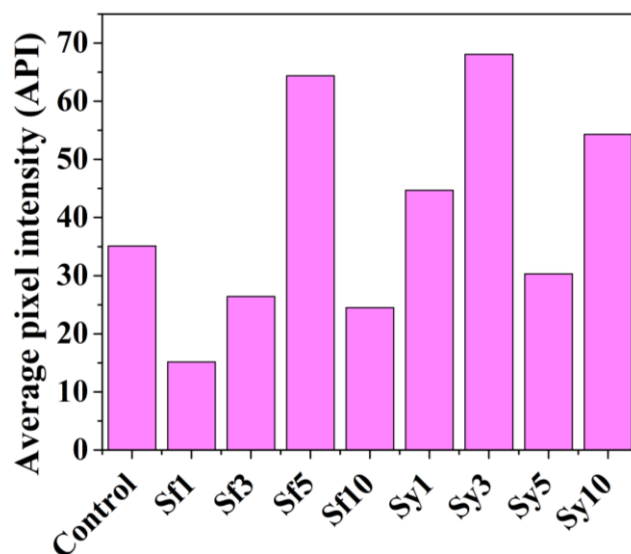

**Figure S1.** Average pixel intensity values obtained from polarized micrographs of the samples.

## 2. FTIR analysis

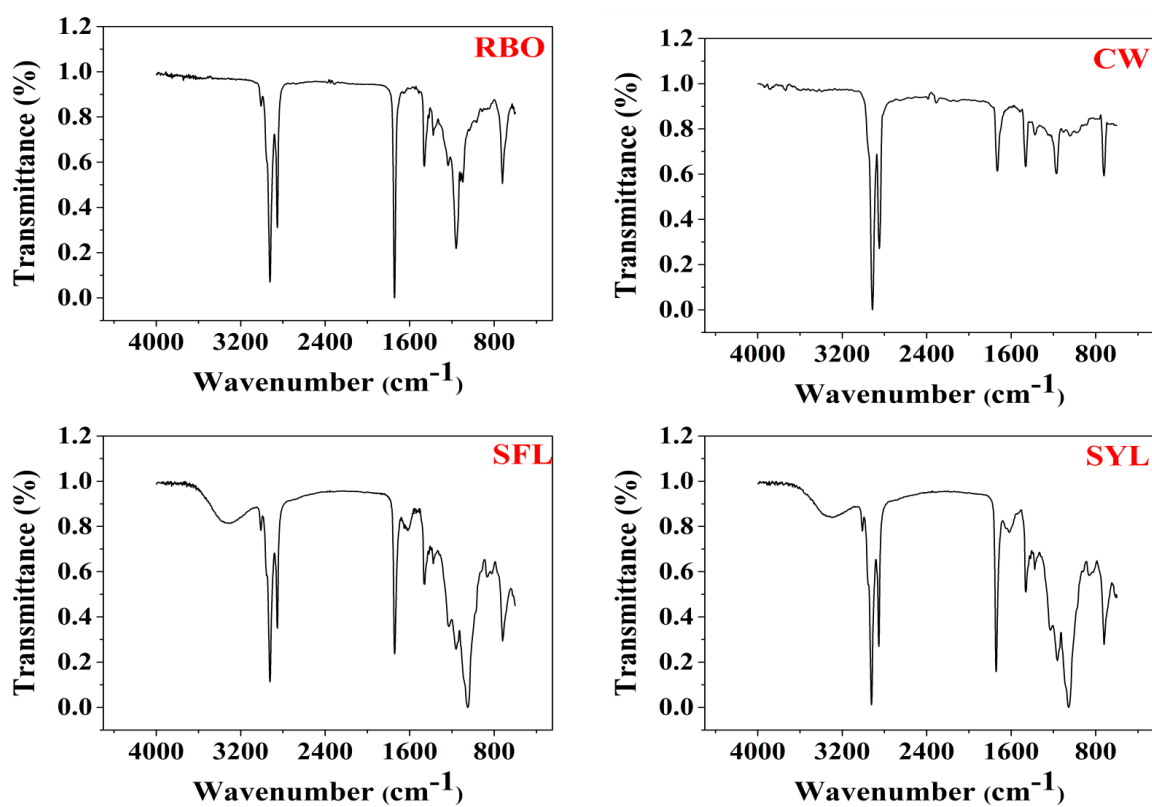

**Figure S2.** FTIR spectral profile of raw components.

### 3. Crystallization kinetics

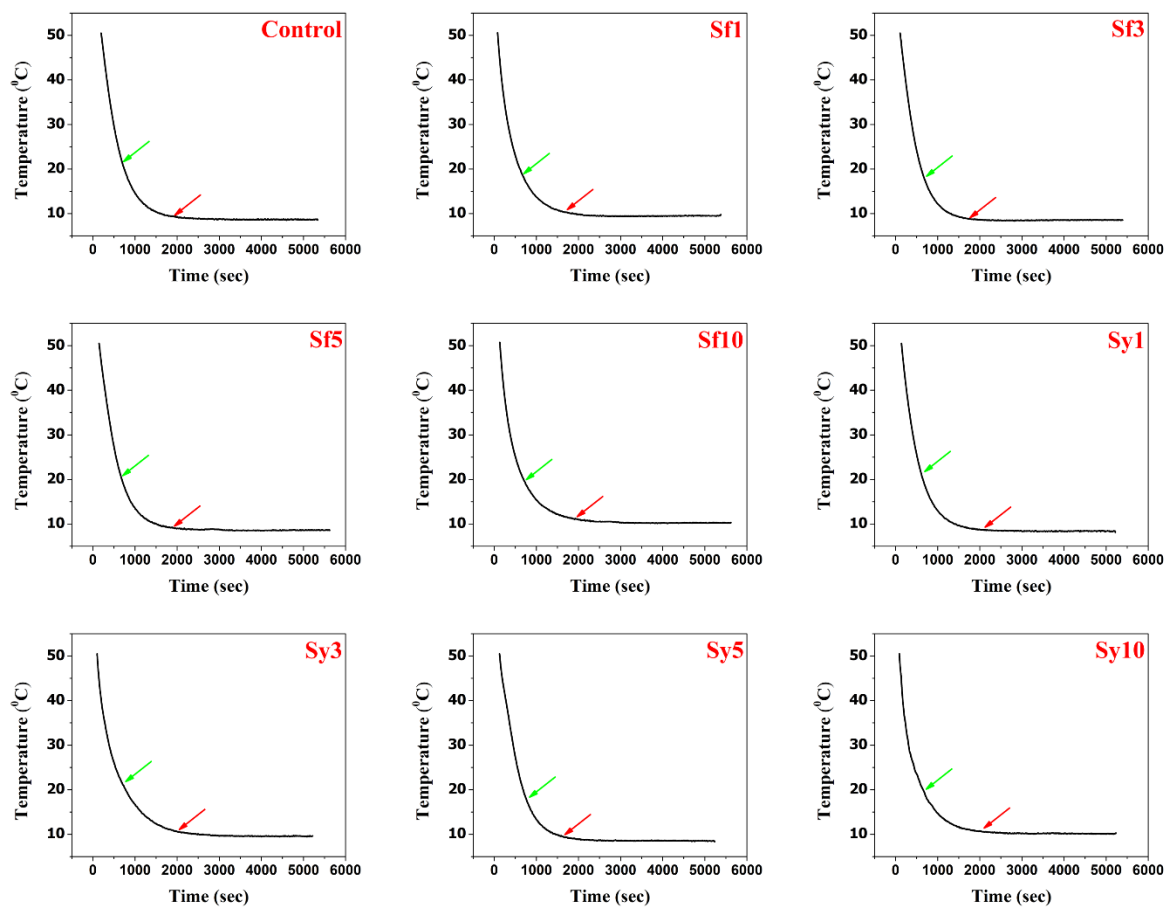

**Figure S3.** Gelation kinetics profiles of the prepared samples.

#### 4. DSC analysis

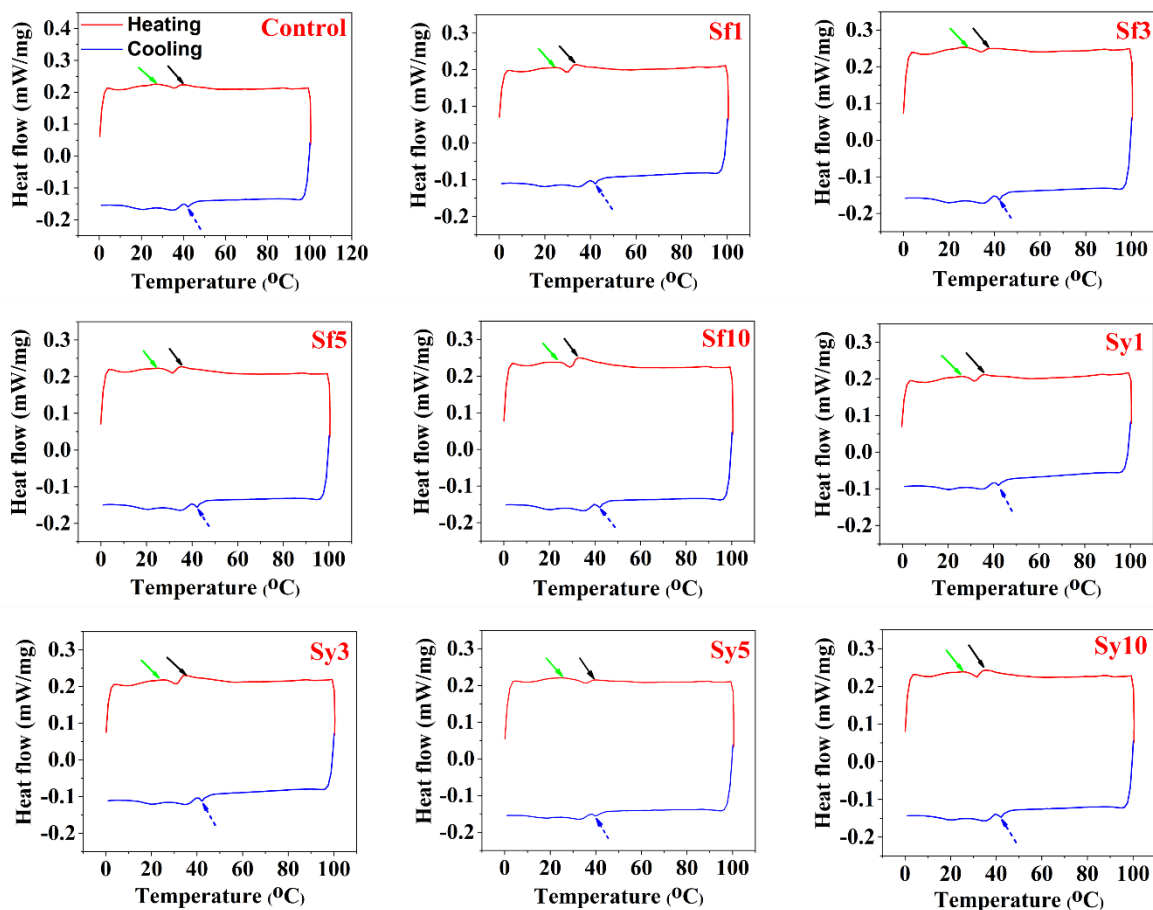

**Figure S4.** DSC melting and crystallization profiles of the prepared samples.

#### 5. Determination of critical gelation concentration (CGC)

The minimum gelator concentration required to form oleogel is known as the CGC. The successful gel formation is confirmed through the non-occurrence of flow when the tubes are inverted. To predict the CGC, we started with the minimum, i.e., 1% (w/w) of CW for gelling RBO and moved till 5% (w/w) of CW. The required amount was allowed to melt in the oil at 90 °C for 25 min to dissolve the CW. The precise mixture was then cooled at room temperature for 5 minutes and kept under refrigeration for gelation. As seen in Figure S3(a-d), the amount of gelator used was insufficient to hold the oil, and therefore, the oil flows on tilting or

inverting. However, at 5% w/w of CW, the oleogel was formed successfully and did not flow on inverting the tube.

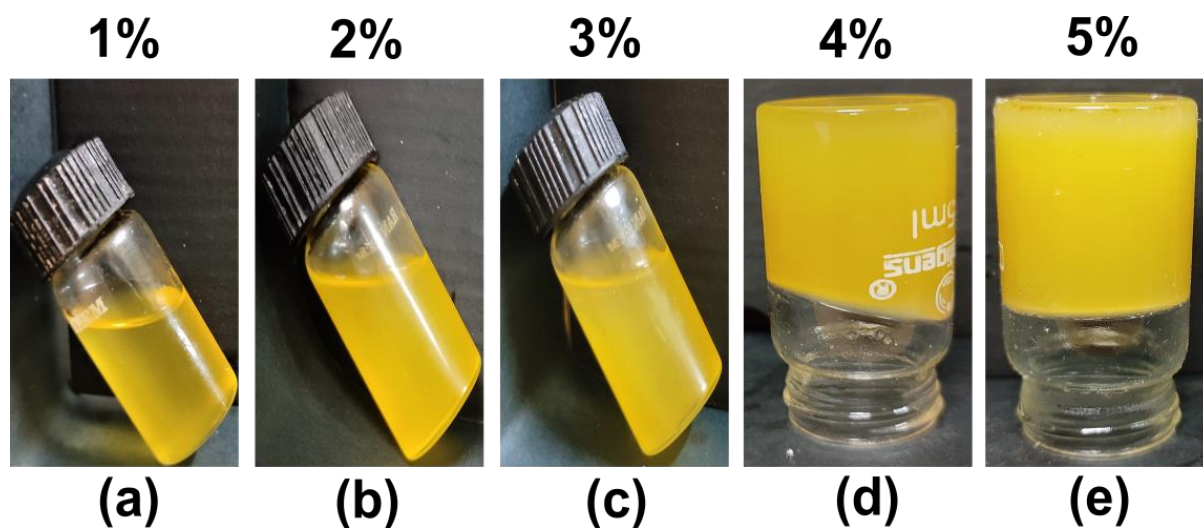

**Figure S5.** Confirmation of oleogel formation through inverted tube method.
